# Supplementary material for: Veterinary Students’ Knowledge and Perceptions About Antimicrobial Stewardship and Biosecurity—A National Survey
Source: MDPI journal article supplement (doi:10.3390/antibiotics7020034), 2018-04-18
Supplement: s1 [file s1]

# Antimicrobial stewardship survey

Please complete the survey below.

If you'd like more information about this survey click on the link to the participant information sheet.

[Attachment: "PLS\_v1.docx"]

Which university do you attend?

- ☐ Charles Sturt University
- ☐ James Cook University
- ☐ Murdoch University
- ☐ University of Adelaide
- ☐ University of Melbourne
- ☐ University of Queensland
- ☐ University of Sydney

All going well, in which year will you graduate?

- ☐ 2017
- ☐ 2018
- ☐ 2019

What is your main area of interest?

- ☐ Companion animals
- ☐ Equine
- ☐ Bovine
- ☐ A mix of the above
- ☐ Public health, government, industry, research
- ☐ Haven't decided yet

Do you think that veterinary use of antimicrobials contributes to overall antimicrobial resistance?

- ☐ Strong contribution
- ☐ Moderate contribution
- ☐ Minimal contribution
- ☐ No contribution
- ☐ Not sure

For the question above, what are the major reasons you answered this way?

---

**For each of the following antimicrobials, please indicate if they are for first, second or third line therapy:**

|                           | First line            | Second line           | Third line            | Not sure              |
|---------------------------|-----------------------|-----------------------|-----------------------|-----------------------|
| Amoxicillin               | <input type="radio"/> | <input type="radio"/> | <input type="radio"/> | <input type="radio"/> |
| Amoxicillin clavulanate   | <input type="radio"/> | <input type="radio"/> | <input type="radio"/> | <input type="radio"/> |
| Amikacin                  | <input type="radio"/> | <input type="radio"/> | <input type="radio"/> | <input type="radio"/> |
| Oxytetracycline           | <input type="radio"/> | <input type="radio"/> | <input type="radio"/> | <input type="radio"/> |
| Metronidazole             | <input type="radio"/> | <input type="radio"/> | <input type="radio"/> | <input type="radio"/> |
| Enrofloxacin              | <input type="radio"/> | <input type="radio"/> | <input type="radio"/> | <input type="radio"/> |
| Procaine penicillin       | <input type="radio"/> | <input type="radio"/> | <input type="radio"/> | <input type="radio"/> |
| Cefovecin                 | <input type="radio"/> | <input type="radio"/> | <input type="radio"/> | <input type="radio"/> |
| Trimethoprim sulphonamide | <input type="radio"/> | <input type="radio"/> | <input type="radio"/> | <input type="radio"/> |
| Gentamicin                | <input type="radio"/> | <input type="radio"/> | <input type="radio"/> | <input type="radio"/> |
| Vancomycin                | <input type="radio"/> | <input type="radio"/> | <input type="radio"/> | <input type="radio"/> |
| Clindamycin               | <input type="radio"/> | <input type="radio"/> | <input type="radio"/> | <input type="radio"/> |
| Chloramphenicol           | <input type="radio"/> | <input type="radio"/> | <input type="radio"/> | <input type="radio"/> |
| Cephalexin                | <input type="radio"/> | <input type="radio"/> | <input type="radio"/> | <input type="radio"/> |
| Marbofloxacin             | <input type="radio"/> | <input type="radio"/> | <input type="radio"/> | <input type="radio"/> |
| Rifampicin                | <input type="radio"/> | <input type="radio"/> | <input type="radio"/> | <input type="radio"/> |

---

**For each of the following scenarios please indicate if you think systemic (injectable or oral) antimicrobials are indicated**

|                                                                                | Always                | Frequently            | Rarely                | Never                 | Not sure              |
|--------------------------------------------------------------------------------|-----------------------|-----------------------|-----------------------|-----------------------|-----------------------|
| Routine dog spey                                                               | <input type="radio"/> | <input type="radio"/> | <input type="radio"/> | <input type="radio"/> | <input type="radio"/> |
| Pancreatitis in a dog                                                          | <input type="radio"/> | <input type="radio"/> | <input type="radio"/> | <input type="radio"/> | <input type="radio"/> |
| 2 year old cat with stranguria and haematuria                                  | <input type="radio"/> | <input type="radio"/> | <input type="radio"/> | <input type="radio"/> | <input type="radio"/> |
| Lame cow                                                                       | <input type="radio"/> | <input type="radio"/> | <input type="radio"/> | <input type="radio"/> | <input type="radio"/> |
| Routine gelding                                                                | <input type="radio"/> | <input type="radio"/> | <input type="radio"/> | <input type="radio"/> | <input type="radio"/> |
| 2 day old wound over the canon bone of a horse with bone exposed               | <input type="radio"/> | <input type="radio"/> | <input type="radio"/> | <input type="radio"/> | <input type="radio"/> |
| Cat with a draining abscess on its face                                        | <input type="radio"/> | <input type="radio"/> | <input type="radio"/> | <input type="radio"/> | <input type="radio"/> |
| Routine dental prophylaxis in a dog                                            | <input type="radio"/> | <input type="radio"/> | <input type="radio"/> | <input type="radio"/> | <input type="radio"/> |
| Upper respiratory tract disease of 4 days duration in an otherwise healthy cat | <input type="radio"/> | <input type="radio"/> | <input type="radio"/> | <input type="radio"/> | <input type="radio"/> |
| Dog with superficial bacterial dermatitis                                      | <input type="radio"/> | <input type="radio"/> | <input type="radio"/> | <input type="radio"/> | <input type="radio"/> |
| 3 week old calf with diarrhoea                                                 | <input type="radio"/> | <input type="radio"/> | <input type="radio"/> | <input type="radio"/> | <input type="radio"/> |
| Foal with patent urachus                                                       | <input type="radio"/> | <input type="radio"/> | <input type="radio"/> | <input type="radio"/> | <input type="radio"/> |
| Horse with fever of unknown origin                                             | <input type="radio"/> | <input type="radio"/> | <input type="radio"/> | <input type="radio"/> | <input type="radio"/> |
| Dog with severe haemorrhagic gastroenteritis but not sepsis                    | <input type="radio"/> | <input type="radio"/> | <input type="radio"/> | <input type="radio"/> | <input type="radio"/> |
| Cow that calved 2 days ago that has retained foetal membranes                  | <input type="radio"/> | <input type="radio"/> | <input type="radio"/> | <input type="radio"/> | <input type="radio"/> |
| 3 year old cow with moderate mastitis in 1 quarter                             | <input type="radio"/> | <input type="radio"/> | <input type="radio"/> | <input type="radio"/> | <input type="radio"/> |
| Colibacillosis in a poultry flock                                              | <input type="radio"/> | <input type="radio"/> | <input type="radio"/> | <input type="radio"/> | <input type="radio"/> |

---

**For each of the following scenarios please indicate if you would submit samples for culture and susceptibility testing:**

|                                                                                                                    | Always                | Frequently            | Rarely                | Never                 | Not sure              |
|--------------------------------------------------------------------------------------------------------------------|-----------------------|-----------------------|-----------------------|-----------------------|-----------------------|
| 2 year old cat with stranguria and haematuria                                                                      | <input type="radio"/> | <input type="radio"/> | <input type="radio"/> | <input type="radio"/> | <input type="radio"/> |
| 5 year old female dog with stranguria and haematuria (first occurrence)                                            | <input type="radio"/> | <input type="radio"/> | <input type="radio"/> | <input type="radio"/> | <input type="radio"/> |
| 5 year old female dog with stranguria and haematuria that has previously been treated with amoxicillin clavulanate | <input type="radio"/> | <input type="radio"/> | <input type="radio"/> | <input type="radio"/> | <input type="radio"/> |
| 4 week old foal with pneumonia                                                                                     | <input type="radio"/> | <input type="radio"/> | <input type="radio"/> | <input type="radio"/> | <input type="radio"/> |
| A group of 4 week old calves with pneumonia                                                                        | <input type="radio"/> | <input type="radio"/> | <input type="radio"/> | <input type="radio"/> | <input type="radio"/> |
| 4 year old cow with mild mastitis in 1 quarter                                                                     | <input type="radio"/> | <input type="radio"/> | <input type="radio"/> | <input type="radio"/> | <input type="radio"/> |
| 4 year old cow with gangrenous mastitis (black mastitis)                                                           | <input type="radio"/> | <input type="radio"/> | <input type="radio"/> | <input type="radio"/> | <input type="radio"/> |
| Otitis externa in a dog (1st occurrence)                                                                           | <input type="radio"/> | <input type="radio"/> | <input type="radio"/> | <input type="radio"/> | <input type="radio"/> |
| Recurrent otitis externa in a dog                                                                                  | <input type="radio"/> | <input type="radio"/> | <input type="radio"/> | <input type="radio"/> | <input type="radio"/> |
| Adult cow with acute watery diarrhoea                                                                              | <input type="radio"/> | <input type="radio"/> | <input type="radio"/> | <input type="radio"/> | <input type="radio"/> |
| Horse with distal limb cellulitis in a single leg                                                                  | <input type="radio"/> | <input type="radio"/> | <input type="radio"/> | <input type="radio"/> | <input type="radio"/> |
| Calf with a septic hock joint                                                                                      | <input type="radio"/> | <input type="radio"/> | <input type="radio"/> | <input type="radio"/> | <input type="radio"/> |
| Foal with a septic hock joint                                                                                      | <input type="radio"/> | <input type="radio"/> | <input type="radio"/> | <input type="radio"/> | <input type="radio"/> |
| Pyothorax in a cat                                                                                                 | <input type="radio"/> | <input type="radio"/> | <input type="radio"/> | <input type="radio"/> | <input type="radio"/> |
| Dog with recurrent pyoderma                                                                                        | <input type="radio"/> | <input type="radio"/> | <input type="radio"/> | <input type="radio"/> | <input type="radio"/> |
| Diarrhoea in grower pigs                                                                                           | <input type="radio"/> | <input type="radio"/> | <input type="radio"/> | <input type="radio"/> | <input type="radio"/> |
| Pneumonia in a group of feedlot cattle                                                                             | <input type="radio"/> | <input type="radio"/> | <input type="radio"/> | <input type="radio"/> | <input type="radio"/> |

What are the 3 most important factors that would influence your decision to submit samples for culture and sensitivity?

- ☐ Location of the infection
- ☐ Ease of obtaining a sample
- ☐ Persistent infection
- ☐ Severe infection
- ☐ Client finances
- ☐ Unusual infection
- ☐ Atypical cytology
- ☐ To confirm a diagnosis
- ☐ Notifiable diseases
- ☐ Herd problems
- ☐ Re-occurring infections
- ☐ Other

Please specify

---

---

**For each of the following scenarios please indicate the level of biosecurity you would take for examination and performing procedures**

---

|                                                                           | None                  | Hand wash after contact | Gloves only           | Gown/overalls only    | Gloves & gown/overalls | Gloves, gown/overalls & face protection (respiratory mask and goggles) | Gloves, overalls with head protection, P2 respiratory mask and goggles | Not sure              |
|---------------------------------------------------------------------------|-----------------------|-------------------------|-----------------------|-----------------------|------------------------|------------------------------------------------------------------------|------------------------------------------------------------------------|-----------------------|
| Routine examination of a dog or cat                                       | <input type="radio"/> | <input type="radio"/>   | <input type="radio"/> | <input type="radio"/> | <input type="radio"/>  | <input type="radio"/>                                                  | <input type="radio"/>                                                  | <input type="radio"/> |
| Routine examination of a horse                                            | <input type="radio"/> | <input type="radio"/>   | <input type="radio"/> | <input type="radio"/> | <input type="radio"/>  | <input type="radio"/>                                                  | <input type="radio"/>                                                  | <input type="radio"/> |
| Routine examination of a cow                                              | <input type="radio"/> | <input type="radio"/>   | <input type="radio"/> | <input type="radio"/> | <input type="radio"/>  | <input type="radio"/>                                                  | <input type="radio"/>                                                  | <input type="radio"/> |
| Horse with fever of unknown origin and neurological signs                 | <input type="radio"/> | <input type="radio"/>   | <input type="radio"/> | <input type="radio"/> | <input type="radio"/>  | <input type="radio"/>                                                  | <input type="radio"/>                                                  | <input type="radio"/> |
| Horse with acute watery diarrhoea                                         | <input type="radio"/> | <input type="radio"/>   | <input type="radio"/> | <input type="radio"/> | <input type="radio"/>  | <input type="radio"/>                                                  | <input type="radio"/>                                                  | <input type="radio"/> |
| Cow with acute watery diarrhoea                                           | <input type="radio"/> | <input type="radio"/>   | <input type="radio"/> | <input type="radio"/> | <input type="radio"/>  | <input type="radio"/>                                                  | <input type="radio"/>                                                  | <input type="radio"/> |
| Cat flu of 4 days duration in an otherwise healthy cat                    | <input type="radio"/> | <input type="radio"/>   | <input type="radio"/> | <input type="radio"/> | <input type="radio"/>  | <input type="radio"/>                                                  | <input type="radio"/>                                                  | <input type="radio"/> |
| Post mortem examination of a cow                                          | <input type="radio"/> | <input type="radio"/>   | <input type="radio"/> | <input type="radio"/> | <input type="radio"/>  | <input type="radio"/>                                                  | <input type="radio"/>                                                  | <input type="radio"/> |
| Post mortem examination of a horse                                        | <input type="radio"/> | <input type="radio"/>   | <input type="radio"/> | <input type="radio"/> | <input type="radio"/>  | <input type="radio"/>                                                  | <input type="radio"/>                                                  | <input type="radio"/> |
| Galah with respiratory disease                                            | <input type="radio"/> | <input type="radio"/>   | <input type="radio"/> | <input type="radio"/> | <input type="radio"/>  | <input type="radio"/>                                                  | <input type="radio"/>                                                  | <input type="radio"/> |
| Aborted foetal material from a horse                                      | <input type="radio"/> | <input type="radio"/>   | <input type="radio"/> | <input type="radio"/> | <input type="radio"/>  | <input type="radio"/>                                                  | <input type="radio"/>                                                  | <input type="radio"/> |
| Routine dental prophylaxis in a dog                                       | <input type="radio"/> | <input type="radio"/>   | <input type="radio"/> | <input type="radio"/> | <input type="radio"/>  | <input type="radio"/>                                                  | <input type="radio"/>                                                  | <input type="radio"/> |
| Cow with dystocia (calving)                                               | <input type="radio"/> | <input type="radio"/>   | <input type="radio"/> | <input type="radio"/> | <input type="radio"/>  | <input type="radio"/>                                                  | <input type="radio"/>                                                  | <input type="radio"/> |
| Sick bat                                                                  | <input type="radio"/> | <input type="radio"/>   | <input type="radio"/> | <input type="radio"/> | <input type="radio"/>  | <input type="radio"/>                                                  | <input type="radio"/>                                                  | <input type="radio"/> |
| Goats with poor conception rates                                          | <input type="radio"/> | <input type="radio"/>   | <input type="radio"/> | <input type="radio"/> | <input type="radio"/>  | <input type="radio"/>                                                  | <input type="radio"/>                                                  | <input type="radio"/> |
| Mare with dystocia (foaling)                                              | <input type="radio"/> | <input type="radio"/>   | <input type="radio"/> | <input type="radio"/> | <input type="radio"/>  | <input type="radio"/>                                                  | <input type="radio"/>                                                  | <input type="radio"/> |
| Methicillin resistant Staphylococcus pseudintermedius dermatitis in a dog | <input type="radio"/> | <input type="radio"/>   | <input type="radio"/> | <input type="radio"/> | <input type="radio"/>  | <input type="radio"/>                                                  | <input type="radio"/>                                                  | <input type="radio"/> |
| An animal with a multi-drug resistant urinary tract infection             | <input type="radio"/> | <input type="radio"/>   | <input type="radio"/> | <input type="radio"/> | <input type="radio"/>  | <input type="radio"/>                                                  | <input type="radio"/>                                                  | <input type="radio"/> |
| When entering a pig farm                                                  | <input type="radio"/> | <input type="radio"/>   | <input type="radio"/> | <input type="radio"/> | <input type="radio"/>  | <input type="radio"/>                                                  | <input type="radio"/>                                                  | <input type="radio"/> |

---

**Please indicate your level of knowledge about the following guidelines:**

---

|                                                                      | Know of               | Have read             | Refer to often        | Never heard of        |
|----------------------------------------------------------------------|-----------------------|-----------------------|-----------------------|-----------------------|
| AVA Guidelines for veterinary personal biosecurity                   | <input type="radio"/> | <input type="radio"/> | <input type="radio"/> | <input type="radio"/> |
| AIDAP Practical infection control guidelines                         | <input type="radio"/> | <input type="radio"/> | <input type="radio"/> | <input type="radio"/> |
| University of Melbourne Australian veterinary prescribing guidelines | <input type="radio"/> | <input type="radio"/> | <input type="radio"/> | <input type="radio"/> |
| AIDAP Antimicrobial prescribing guidelines for dogs and cats         | <input type="radio"/> | <input type="radio"/> | <input type="radio"/> | <input type="radio"/> |

---

**Please indicate how strongly you agree to each of the following statements:**

|                                                                                                     | Strongly agree        | Agree                 | Neither agree<br>nor disagree | Disagree              | Strongly<br>disagree  |
|-----------------------------------------------------------------------------------------------------|-----------------------|-----------------------|-------------------------------|-----------------------|-----------------------|
| I understand what antimicrobial stewardship is.                                                     | <input type="radio"/> | <input type="radio"/> | <input type="radio"/>         | <input type="radio"/> | <input type="radio"/> |
| The amount of teaching time for prudent antibiotic use is about right.                              | <input type="radio"/> | <input type="radio"/> | <input type="radio"/>         | <input type="radio"/> | <input type="radio"/> |
| I understand antimicrobial resistance mechanisms.                                                   | <input type="radio"/> | <input type="radio"/> | <input type="radio"/>         | <input type="radio"/> | <input type="radio"/> |
| I have a good knowledge of the pharmacology of antibiotics.                                         | <input type="radio"/> | <input type="radio"/> | <input type="radio"/>         | <input type="radio"/> | <input type="radio"/> |
| The amount of teaching time for pharmacology is about right.                                        | <input type="radio"/> | <input type="radio"/> | <input type="radio"/>         | <input type="radio"/> | <input type="radio"/> |
| I know how to use antibiotics to minimise the risk of antimicrobial resistance developing.          | <input type="radio"/> | <input type="radio"/> | <input type="radio"/>         | <input type="radio"/> | <input type="radio"/> |
| What I have learnt about antibiotic use in clinics is the same as what is taught to me in lectures. | <input type="radio"/> | <input type="radio"/> | <input type="radio"/>         | <input type="radio"/> | <input type="radio"/> |
| What I have learnt in clinics is more useful than what I learnt in lectures.                        | <input type="radio"/> | <input type="radio"/> | <input type="radio"/>         | <input type="radio"/> | <input type="radio"/> |

Anything else you'd like to tell us?

---

Thank you for completing the survey! You're entitled to a copy of the guidelines as a thanks from us. If you didn't get your copy please email me at: [laura.hardefeldt@unimelb.edu.au](mailto:laura.hardefeldt@unimelb.edu.au)
